# Supplementary material for: Bisphenol A Removal by the Fungus Myrothecium roridumIM 6482—Analysis of the Cellular and Subcellular Level
Source: MDPI journal article supplement (doi:10.3390/ijms221910676), 2021-10-01
Supplement: s1 [file s1]

A

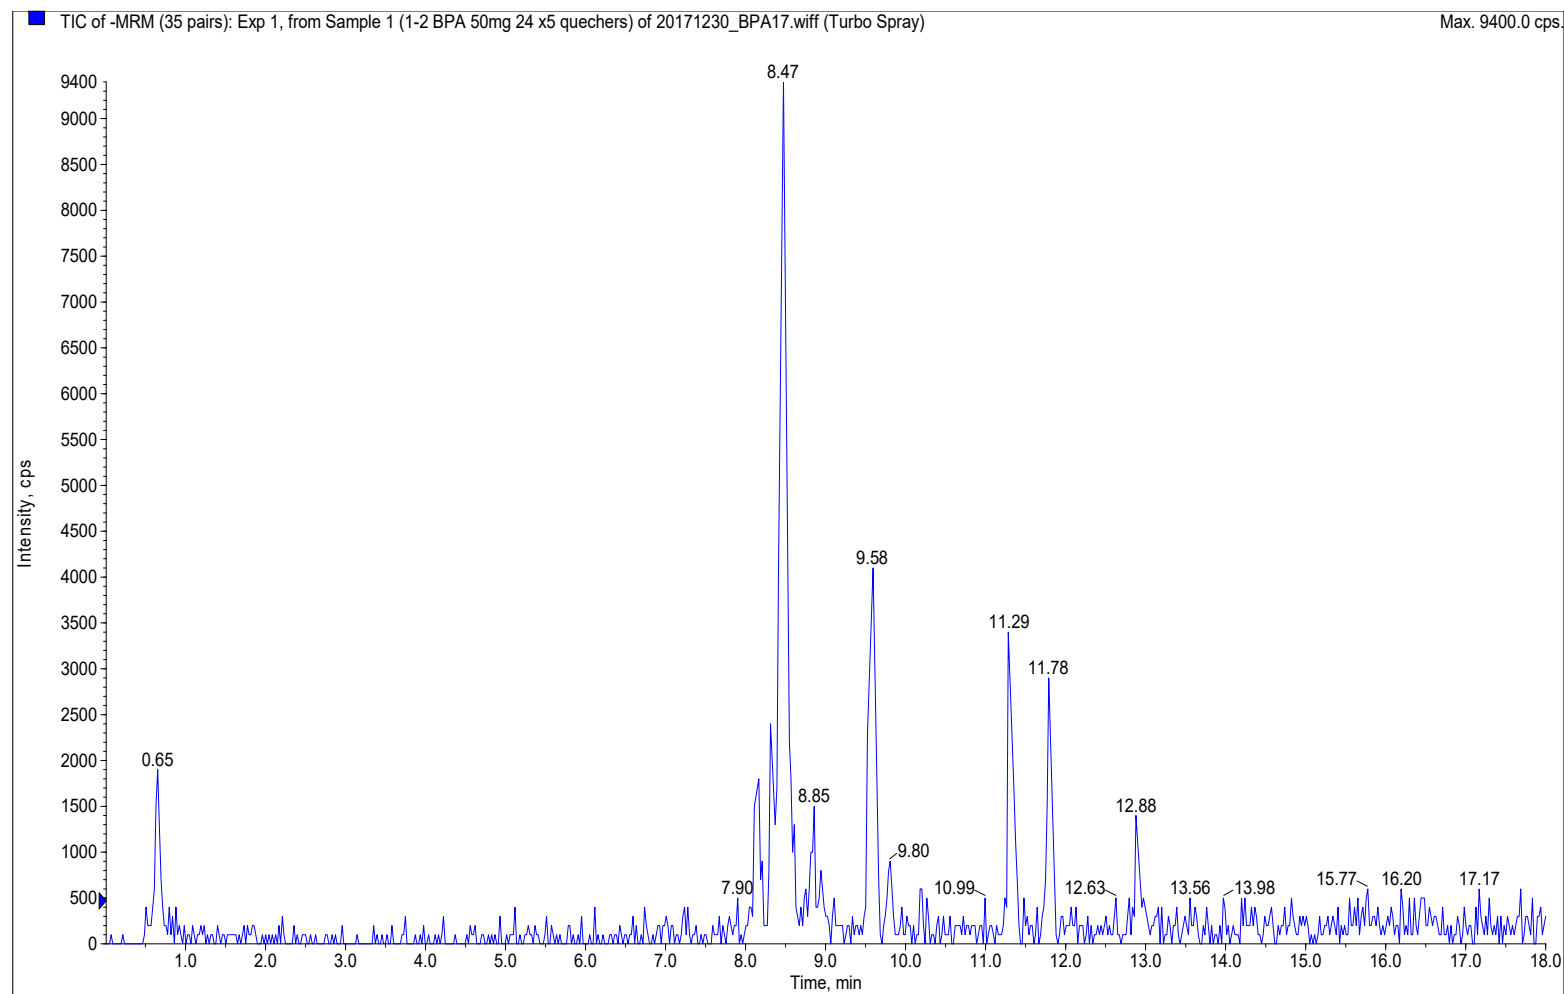

B

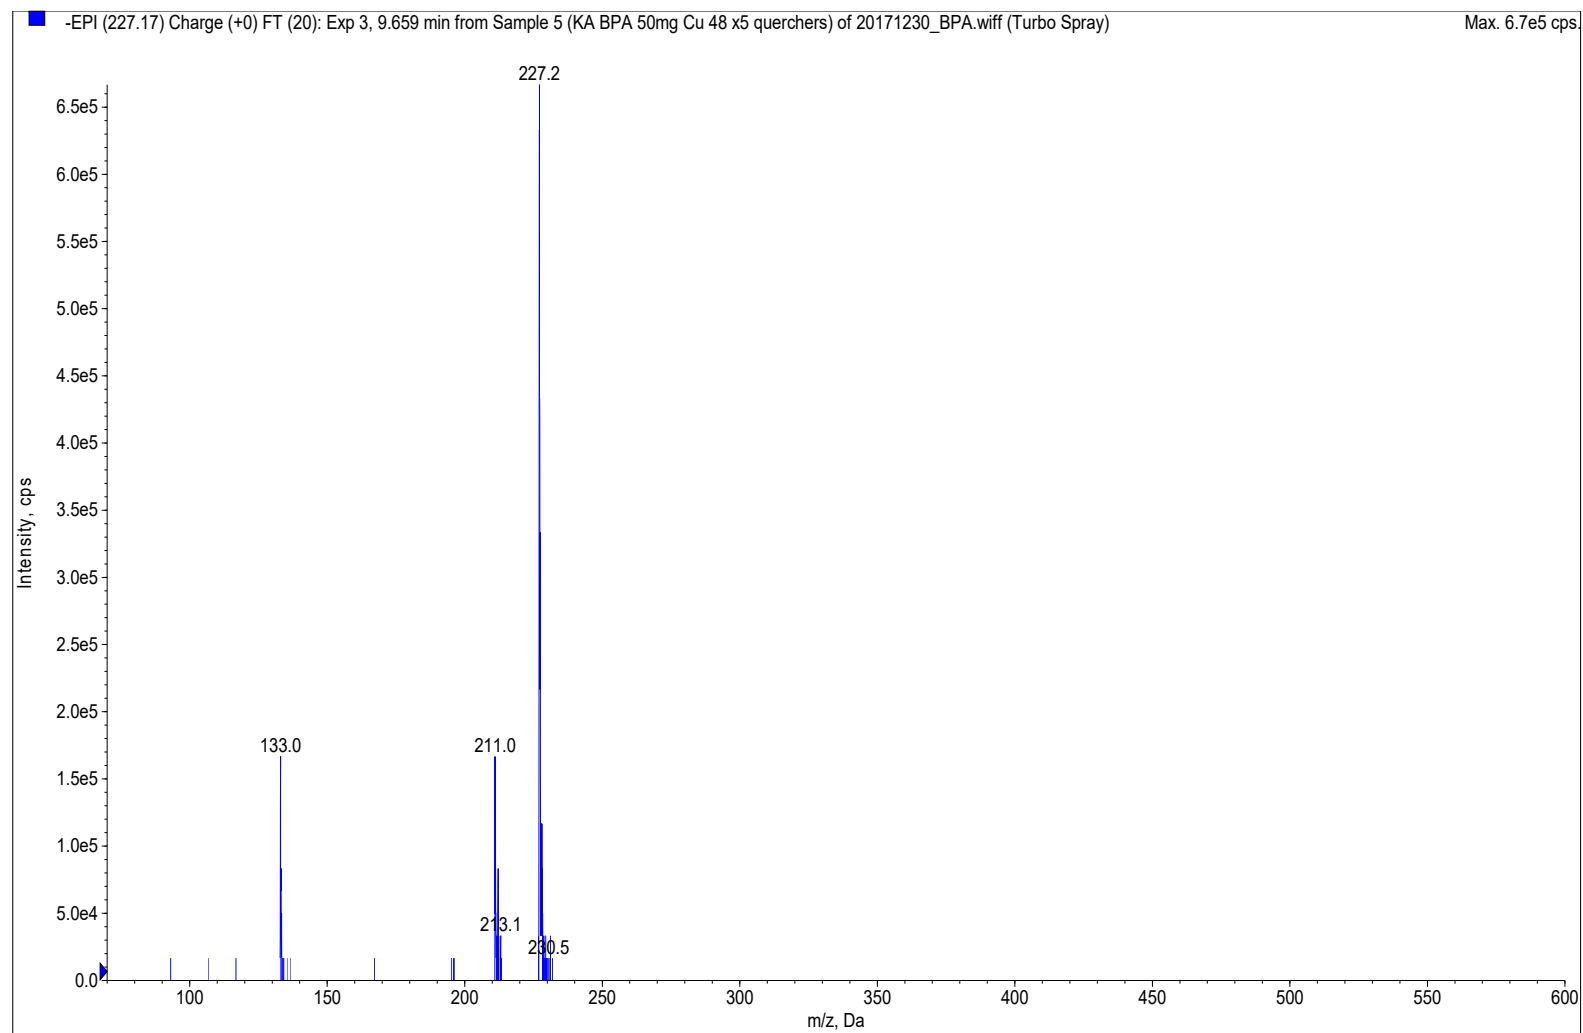

C

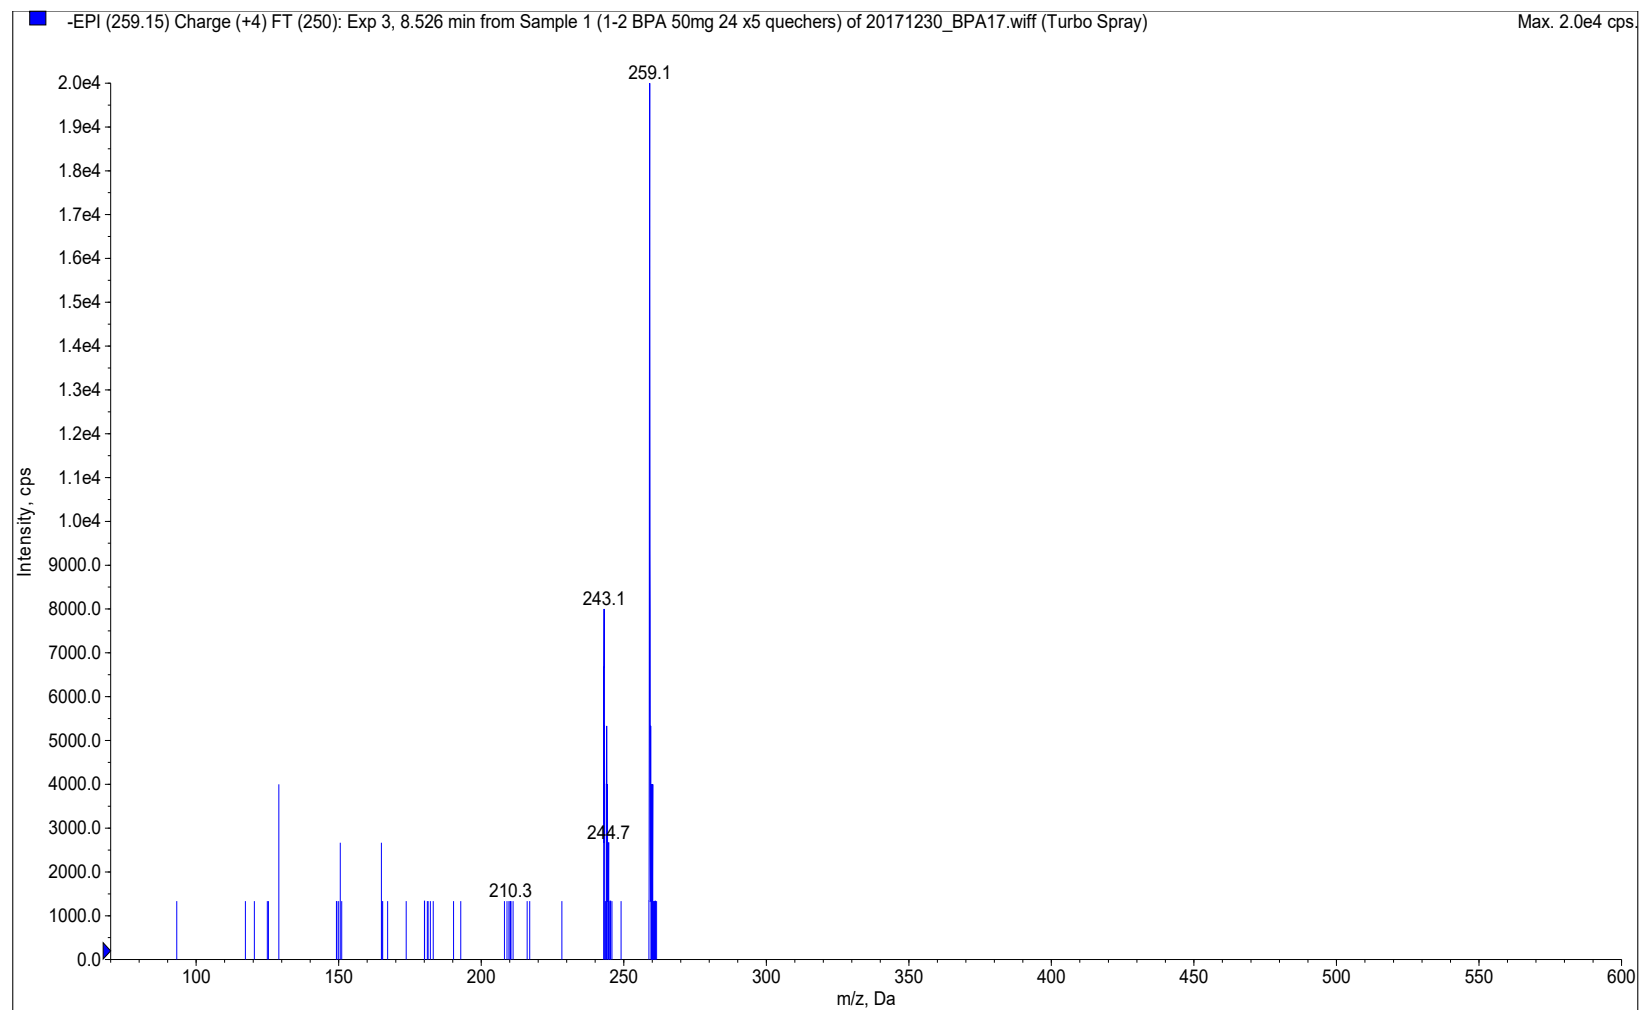

D

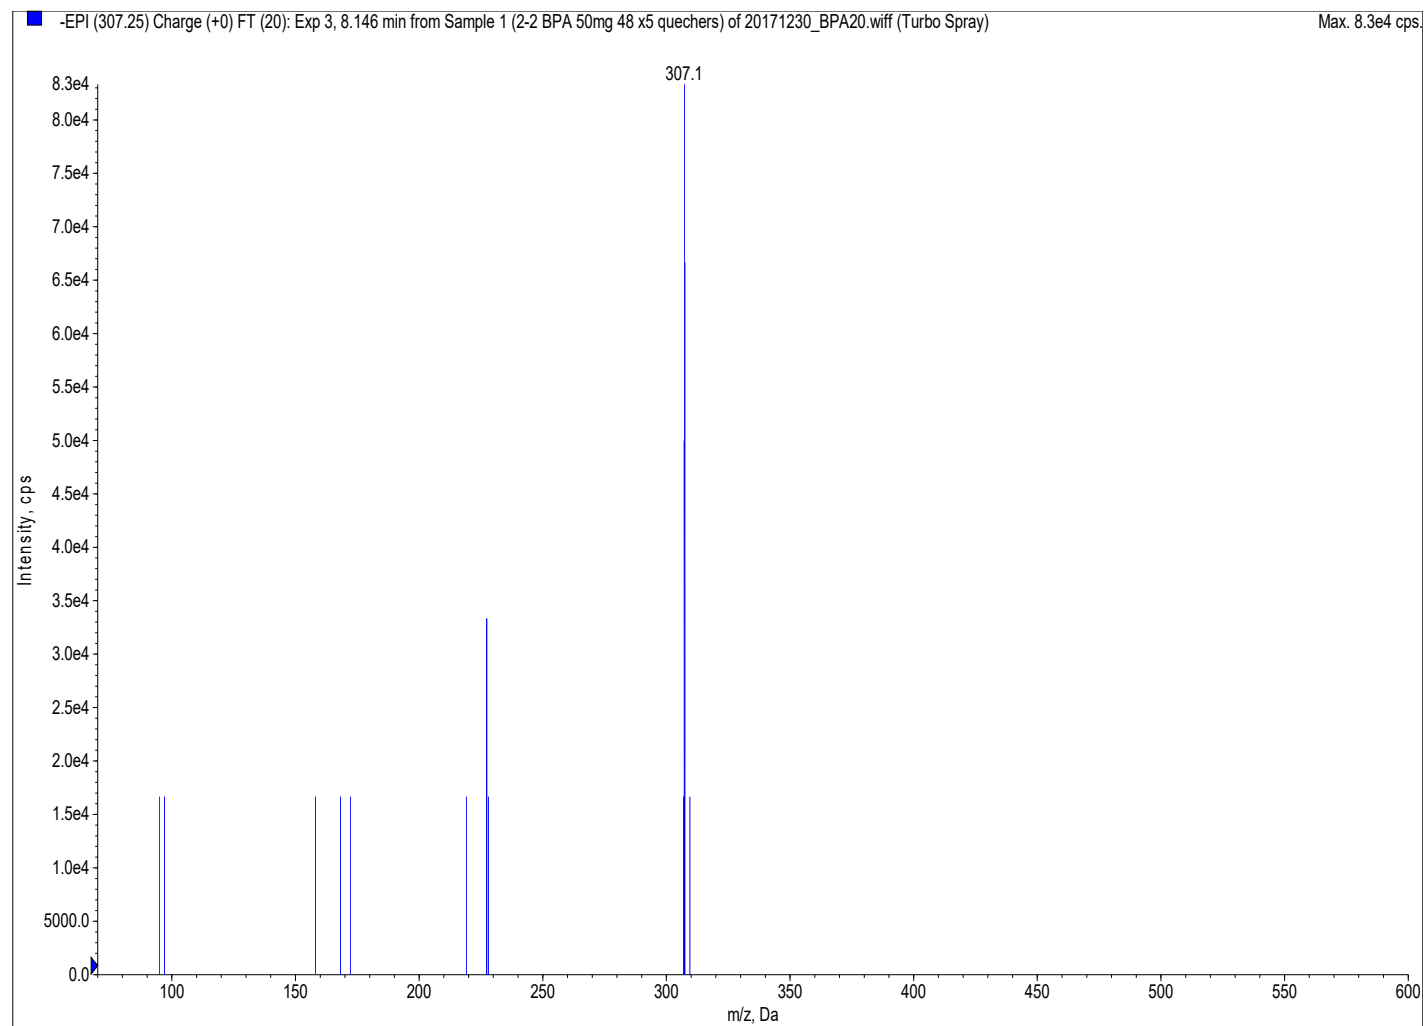

E

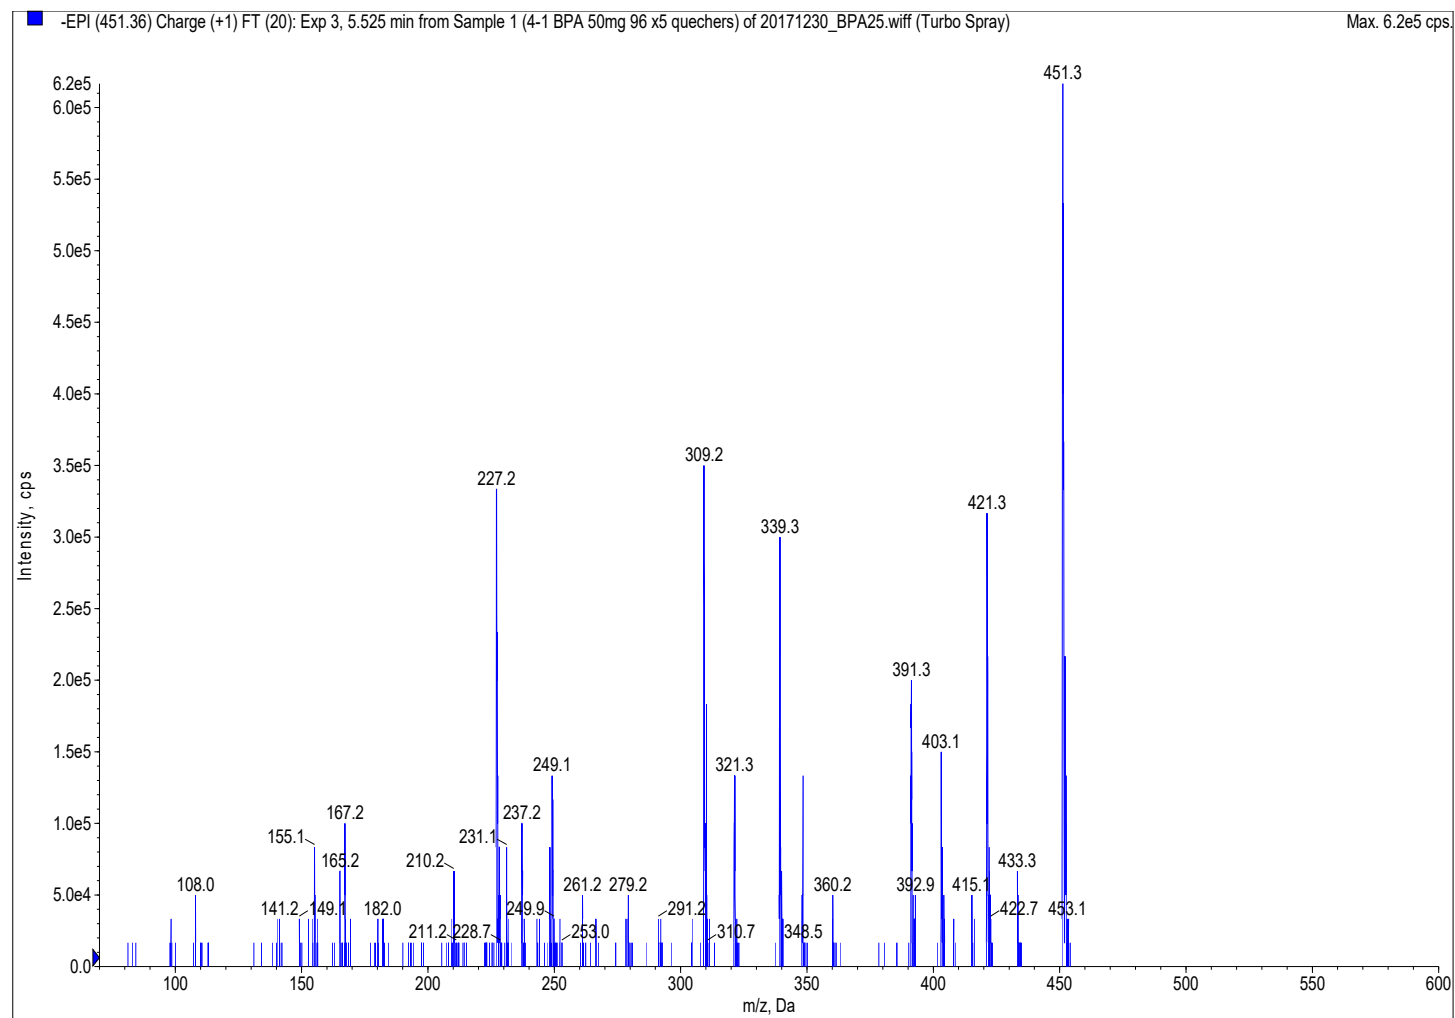

F

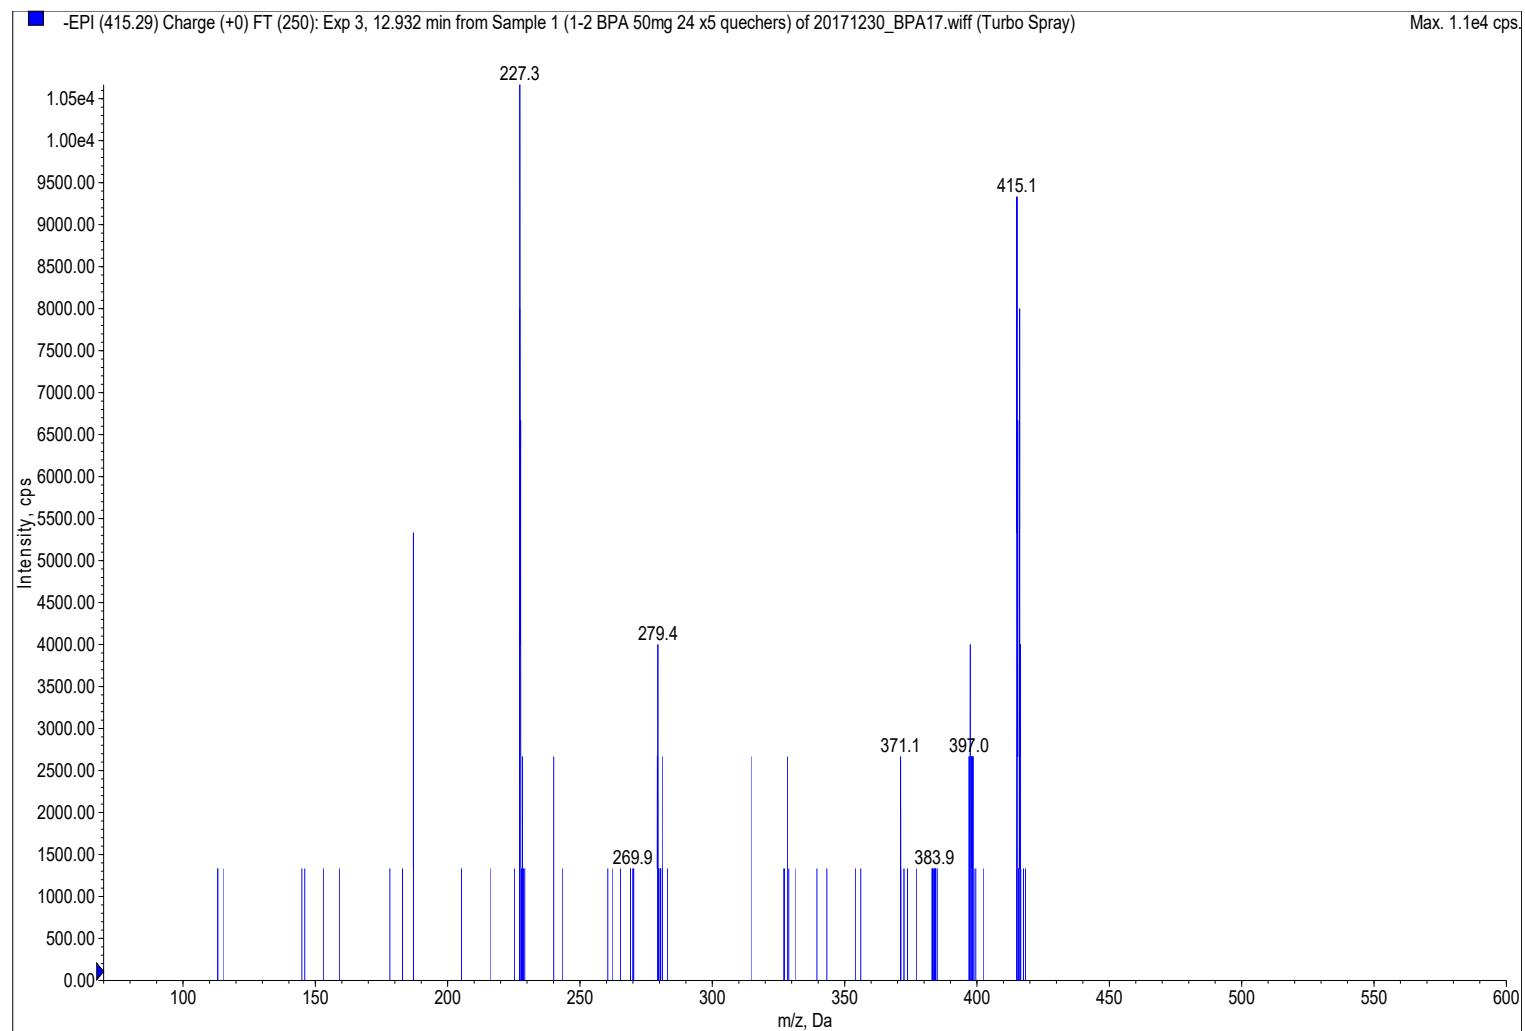

G

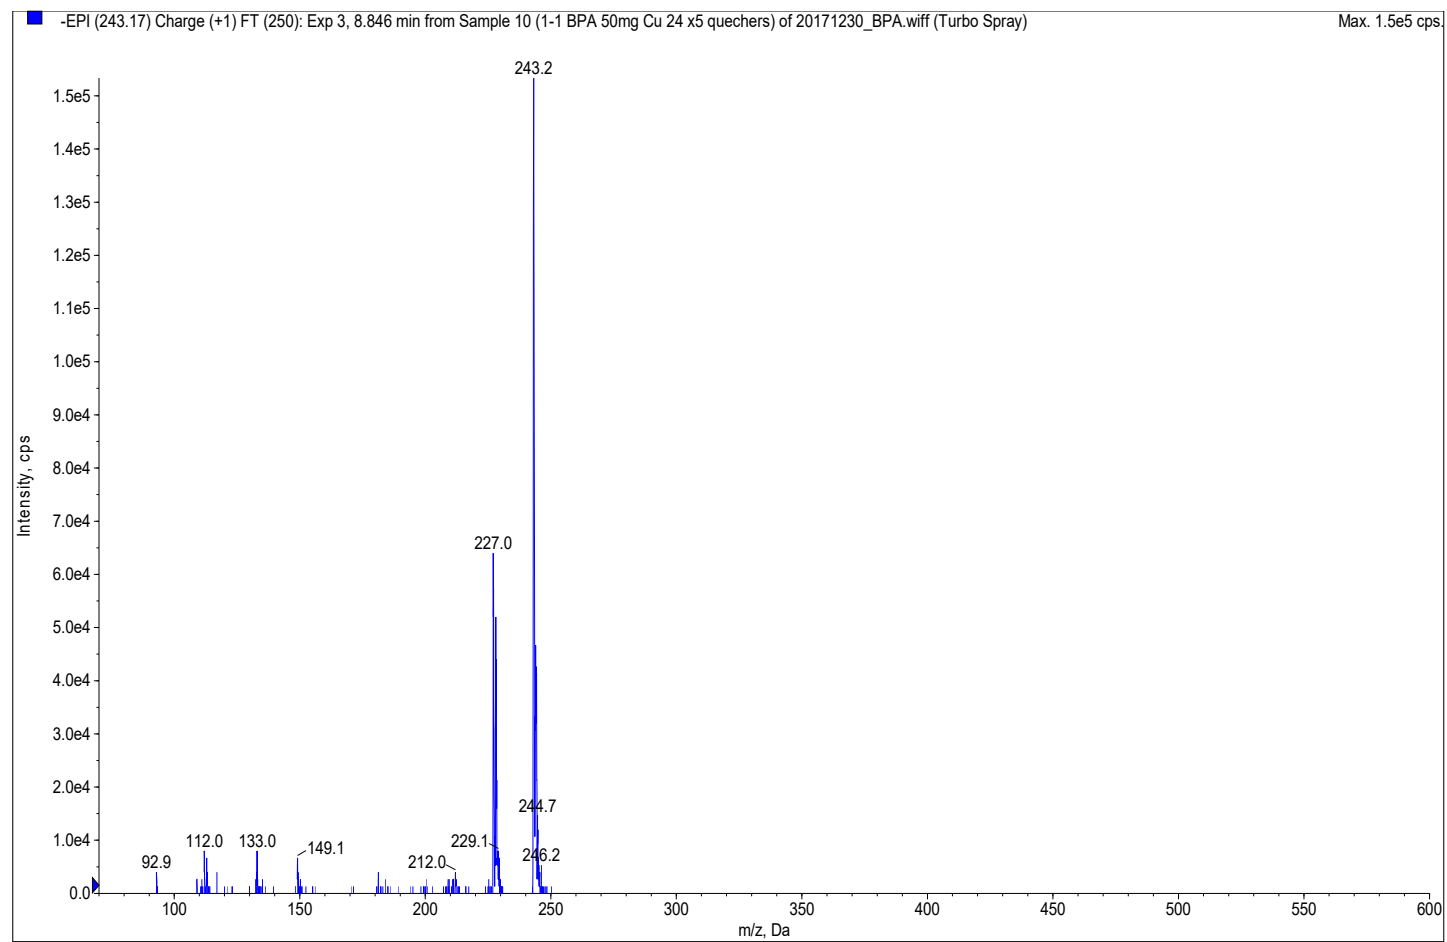

**Figure S1.** Chromatogram obtained after extraction of *M. roridum* cultures cultivated in Czapek-Dox medium supplemented with 50 mg l<sup>-1</sup> BPA (A) and mass spectra of BPA (B) and its metabolites: M1 (C), M2 (D), M3 (E), M4 (F), M5 (G) formed in fungal cultures.

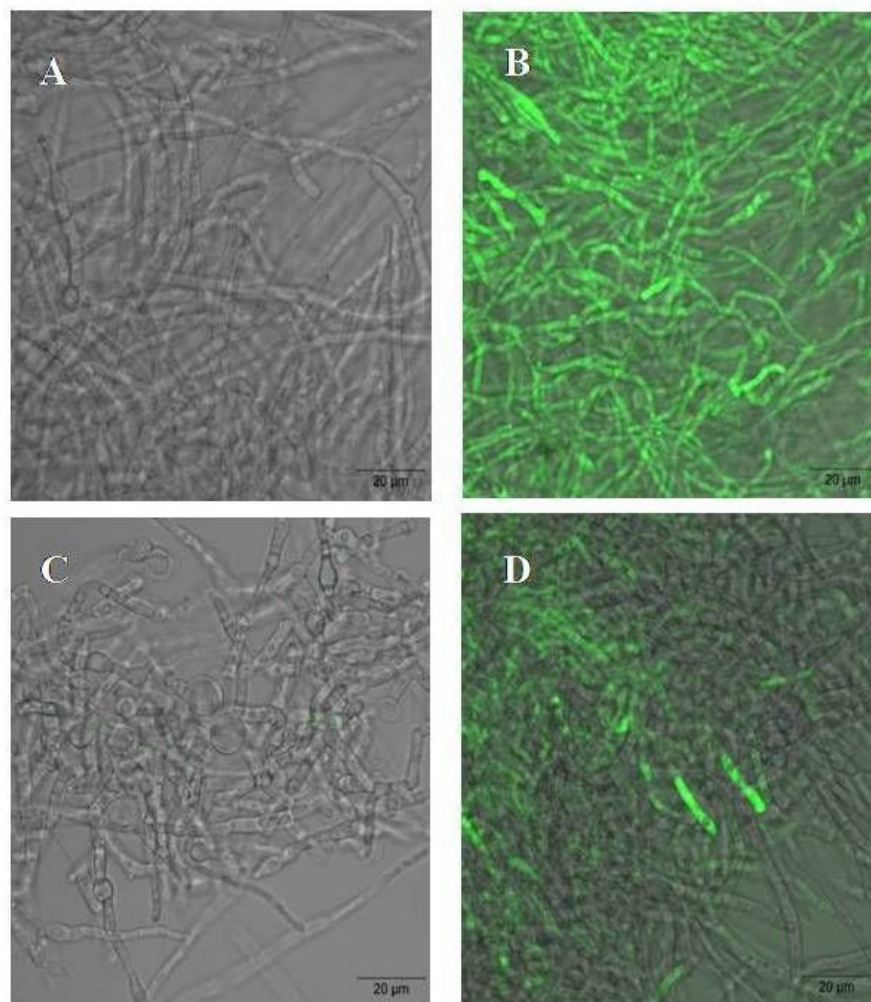

**Figure S2.** ROS generation in the *M. roridum* cultures. Control without BPA after 24 h (A) and 72 h (C); cultures supplemented with BPA after 24 h (B) and 72 h (D). The hyphal fluorescence indicates ROS generation.





**Tabela S1.** Summary identification of *M. roridum* IM 6482 proteins isolated from control cultures (without BPA).

| Spot no. | Best Protein Accession | Best Protein Mass | Best Protein Score | Best Protein Description                          | Organism                                          |
|----------|------------------------|-------------------|--------------------|---------------------------------------------------|---------------------------------------------------|
| 2        | PQK16867.1             | 11454             | 148                | hypothetical protein BB8028_0007g00680            | <i>Beauveria bassiana</i>                         |
| 5        | OAA81287.1             | 19600             | 121                | peptidyl-prolyl cis-trans isomerase               | <i>Cordyceps confragosa</i> RCEF 1005             |
| 10       | EEU44844.1             | 16912             | 91                 | predicted protein                                 | <i>Nectria haematococcamp</i> VI 77-13-4          |
| 19       | PTD04586.1             | 28552             | 79                 | 40S ribosomal protein S3                          | <i>Fusarium culmorum</i>                          |
| 22       | XP_018656864.2         | 34018             | 199                | malate dehydrogenase, partial                     | <i>Trichoderma gamsii</i>                         |
| 29       | XP_018180540.1         | 59623             | 92                 | ATP synthase alpha chain, mitochondrial precursor | <i>Purpureocillium lilacinum</i>                  |
| 32       | PTB35940.1             | 78531             | 84                 | hypothetical protein M441DRAFT_152105             | <i>Trichoderma asperellum</i> CBS 433.97          |
| 55       | KOS18933.1             | 54440             | 155                | ATP synthase subunit beta                         | <i>Escovopsis weberi</i>                          |
| 57       | XP_016588082.1         | 69320             | 103                | heat shock 70kDa protein 1/8                      | <i>Sporothrix schenckii</i> 1099-18               |
| 59       | PTB80850.1             | 47299             | 80                 | phosphopyruvate hydratase                         | <i>Trichoderma longibrachiatum</i> ATCC 18648 0.1 |
| 60       | ODA79096.1             | 42721             | 95                 | hypothetical protein RJ55_04687                   | <i>Drechmeria coniospora</i>                      |

| Spot no. | Best Protein Accession | Best Protein Mass | Best Protein Score | Best Protein Description              | Organism                                     |
|----------|------------------------|-------------------|--------------------|---------------------------------------|----------------------------------------------|
| 66       | KIL95357.1             | 77769             | 155                | hypothetical protein FAVG1_00093      | <i>Fusariumavenaceum</i>                     |
| 67       | GAO16225.1             | 72752             | 103                | hypothetical protein UVI_02000080     | <i>Ustilagoideavirens</i>                    |
| 68       | PTB80850.1             | 47299             | 155                | phosphopyruvatehydratase              | <i>Trichodermalongibrachiatum</i> ATCC 18648 |
| 69       | PTB80850.1             | 47299             | 146                | phosphopyruvatehydratase              | <i>Trichodermalongibrachiatum</i> ATCC 18648 |
| 70       | PTB80850.1             | 47299             | 138                | phosphopyruvatehydratase              | <i>Trichodermalongibrachiatum</i> ATCC 18648 |
| 71       | ODA77078.1             | 26963             | 100                | hypothetical protein RJ55_07596       | <i>Drechmeriaconiospora</i>                  |
| 74       | POR33248.1             | 62028             | 97                 | Inorganicpyrophosphatase              | <i>Tolypocladiumparadoxum</i>                |
| 78       | XP_018139774.1         | 31537             | 174                | coatomersubunit epsilon               | <i>Pochoniachlamydosporia</i> 170            |
| 81       | ORY66301.1             | 43858             | 128                | S-adenosylmethioninesynthetase        | <i>Pseudomassariellavexata</i>               |
| 86       | PTB35940.1             | 78531             | 78                 | hypothetical protein M441DRAFT_152105 | <i>Trichodermaasperellum</i> CBS 433.97      |
| 88       | AID48697.1             | 37452             | 200                | actin, partial                        | <i>Neotyphodium</i> sp. NI_201306            |

| Spot no. | Best Protein Accession | Best Protein Mass | Best Protein Score | Best Protein Description                            | Organism                                      |
|----------|------------------------|-------------------|--------------------|-----------------------------------------------------|-----------------------------------------------|
| 90       | PQK13047.1             | 30402             | 84                 | hypothetical protein BB8028_0003g16610              | <i>Beauveria bassiana</i>                     |
| 91       | POR33248.1             | 62028             | 98                 | Inorganic pyrophosphatase                           | <i>Tolypocladium paradoxum</i>                |
| 92       | OTA68683.1             | 25460             | 149                | mitochondrial peroxiredoxin PRX1                    | <i>Hypoxylon</i> sp. EC38                     |
| 96       | XP_009260797.1         | 17927             | 119                | hypothetical protein FPSE_09405                     | <i>Fusarium pseudograminearum</i> CS3096      |
| 97       | PHH82764.1             | 18833             | 78                 | hypothetical protein CDD82_4929                     | <i>Ophiocordyceps australis</i>               |
| 98       | PNY28828.1             | 26923             | 125                | Actin cross-linking                                 | <i>Tolypocladium capitatum</i>                |
| 99       | PNY25025.1             | 13598             | 201                | Profilin                                            | <i>Tolypocladium capitatum</i>                |
| 100      | XP_018160338.1         | 17955             | 156                | Cytochrome c oxidase subunit Va                     | <i>Colletotrichum higginsianum</i> IMI 349063 |
| 101      | CCE28255.1             | 16874             | 90                 | related to cofilin                                  | <i>Claviceps purpurea</i> 20.1                |
| 105      | EQL03272.1             | 36308             | 110                | outer mitochondrial membrane protein porin          | <i>Ophiocordyceps sinensis</i> CO18           |
| 106      | PTD05987.1             | 16456             | 112                | Nascent polypeptide-associated complex subunit beta | <i>Fusarium culmorum</i>                      |
| 107      | KIL96612.1             | 10977             | 75                 | hypothetical protein FAVG1_01356                    | <i>Fusarium avenaceum</i>                     |

| Spot no. | Best Protein Accession | Best Protein Mass | Best Protein Score | Best Protein Description        | Organism                        |
|----------|------------------------|-------------------|--------------------|---------------------------------|---------------------------------|
| 108      | AGY49501.1             | 12583             | 137                | calmodulin, partial             | <i>Fusariumandiyazi</i>         |
| 109      | PTD11202.1             | 31749             | 78                 | 14-3-3 protein                  | <i>Fusariumculmorum</i>         |
| 110      | PNY29201.1             | 10793             | 117                | 60S acidic ribosomal protein P2 | <i>Tolypocladiumcapitatum</i>   |
| 111      | PTB69803.1             | 30245             | 96                 | 14-3-3-like protein             | <i>Trichodermacitrinoviride</i> |
| 112      | PTB69803.1             | 30245             | 96                 | 14-3-3-like protein             | <i>Trichodermacitrinoviride</i> |

**Tabela S2.** Summary identification of *M. roridum* IM 6482 proteins isolated from cultures containing 50 mg L<sup>-1</sup> BPA.

| Spot no. | Best Protein Accession | Best Protein Mass | Best Protein Score | Best Protein Description                  | Organism                                 |
|----------|------------------------|-------------------|--------------------|-------------------------------------------|------------------------------------------|
| 115      | PQK15291.1             | 22856             | 144                | hypothetical protein BB8028_0005g08050    | <i>Beauveria bassiana</i>                |
| 116      | ABQ42572.1             | 36234             | 224                | glyceraldehyde-3-phosphate dehydrogenase  | <i>Myrothecium gramineum</i>             |
| 117      | PSR79323.1             | 11114             | 136                | peptidyl-prolyl cis-trans isomerase fkr-3 | <i>Coniella lustricola</i>               |
| 118      | EEU44844.1             | 16912             | 173                | predicted protein                         | <i>Nectria haematococcamp</i> VI 77-13-4 |
| 119      | EEU44844.1             | 16912             | 150                | predicted protein                         | <i>Nectria haematococcamp</i> VI 77-13-4 |
| 120      | OAA81287.1             | 19600             | 284                | peptidyl-prolyl cis-trans isomerase       | <i>Cordyceps confragosa</i> RCEF 1005    |
| 121      | EEU44844.1             | 16912             | 115                | predicted protein                         | <i>Nectria haematococcamp</i> VI 77-13-4 |
| 122      | PQK16867.1             | 11454             | 91                 | hypothetical protein BB8028_0007g00680    | <i>Beauveria bassiana</i>                |
| 123      | EEU45443.1             | 37541             | 475                | predicted protein                         | <i>Nectria haematococcamp</i> VI 77-13-4 |
| 124      | KFH42761.1             | 49928             | 30                 | Elongation factor 1-alpha-like protein    | <i>Acremonium chrysogenum</i> ATCC 11550 |
| 125      | PQK15291.1             | 22856             | 128                | hypothetical protein BB8028_0005g08050    | <i>Beauveria bassiana</i>                |

| Spot no. | Best Protein Accession | Best Protein Mass | Best Protein Score | Best Protein Description                  | Organism                                        |
|----------|------------------------|-------------------|--------------------|-------------------------------------------|-------------------------------------------------|
| 131      | EEU42998.1             | 23091             | 131                | predicted protein                         | <i>Nectria haematococcamp</i> VI 77-13-4        |
| 133      | POR36939.1             | 15791             | 91                 | Superoxide dismutase [Cu-Zn]              | <i>Tolypocladium paradoxum</i>                  |
| 142      | PNY25025.1             | 13598             | 79                 | Profilin                                  | <i>Tolypocladium capitatum</i>                  |
| 144      | XP_018177206.1         | 36217             | 219                | glyceraldehyde-3-phosphate dehydrogenase  | <i>Purpureocillium lilacinum</i>                |
| 145      | XP_024404531.1         | 52336             | 130                | adenylyl-sulfate kinase                   | <i>Trichoderma gamsii</i>                       |
| 146      | POR37810.1             | 55242             | 322                | ATP synthase subunit beta                 | <i>Tolypocladium paradoxum</i>                  |
| 147      | POR37810.1             | 55242             | 262                | ATP synthase subunit beta                 | <i>Tolypocladium paradoxum</i>                  |
| 148      | POR35368.1             | 52948             | 344                | Enolase, partial                          | <i>Tolypocladium paradoxum</i>                  |
| 149      | EMT70814.1             | 35277             | 407                | Malate dehydrogenase, mitochondrial       | <i>Fusarium oxysporum f. sp. cubense</i> race 4 |
| 150      | OAR02581.1             | 38327             | 509                | hypothetical protein LLEC1_00332, partial | <i>Cordyceps confragosa</i>                     |
| 151      | KZZ90744.1             | 34989             | 521                | malate dehydrogenase precursor            | <i>Moelleriella libera</i> RCEF 2490            |
| 152      | XP_018136472.1         | 40886             | 159                | acetyl-CoA C-acetyltransferase            | <i>Pochonia chlamydosporia</i> 170              |

| Spot no. | Best Protein Accession | Best Protein Mass | Best Protein Score | Best Protein Description                                               | Organism                                                 |
|----------|------------------------|-------------------|--------------------|------------------------------------------------------------------------|----------------------------------------------------------|
| 153      | XP_022284686.1         | 58260             | 419                | 6-phosphogluconate dehydrogenase                                       | <i>Pochoniachlamydosporia</i> 170                        |
| 154      | EEU44203.1             | 77244             | 85                 | hypothetical protein NECHADRAFT_65315                                  | <i>Nectria haematococcamp</i> VI 77-13-4                 |
| 155      | KIL87093.1             | 81262             | 202                | catalase-peroxidase                                                    | <i>Fusarium avenaceum</i>                                |
| 156      | EFY93483.1             | 73112             | 508                | heat shock 70 kDa protein precursor                                    | <i>Metarhizium acridum</i> CQMa 102                      |
| 157      | PQK16496.1             | PQK16496.1        | 141                | hypothetical protein BB8028_0006g08160                                 | <i>Beauveria bassiana</i>                                |
| 158      | ABQ42572.1             | ABQ42572.1        | 548                | glyceraldehyde-3-phosphate dehydrogenase                               | <i>Myrothecium gramineum</i>                             |
| 159      | XP_013944143.1         | 36069             | 284                | UDP-glucose 4-epimerase Gal10                                          | <i>Trichoderma atroviride</i> IMI 206040                 |
| 162      | IQCR2_NEUCR            | 40553             | 75                 | Ubiquinol-cytochrome-c reductase complex core protein                  | <i>Neurospora crassa</i> OR74A                           |
| 163      | GAO18194.1             | 36533             | 452                | hypothetical protein UVI_02036930                                      | <i>Ustilago idaeae</i> virens                            |
| 164      | KFA79660.1             | 46953             | 380                | hypothetical protein S40288_04082                                      | <i>Stachybotrys chartarum</i> IBT 40288                  |
| 165      | XP_018235168.1         | 19005             | 178                | tyrosine 3-monooxygenase/tryptophan 5-monooxygenase activation protein | <i>Fusarium oxysporum</i> f. sp. <i>lycopersici</i> 4287 |
| 166      | KFA60529.1             | 56642             | 101                | hypothetical protein S40285_07587                                      | <i>Stachybotrys chlorohalonata</i> IBT 40285             |



| Spot no. | Best Protein Accession | Best Protein Mass | Best Protein Score | Best Protein Description                  | Organism                                        |
|----------|------------------------|-------------------|--------------------|-------------------------------------------|-------------------------------------------------|
| 167      | PQK16496.1             | 36069             | 126                | hypothetical protein BB8028_0006g08160    | <i>Beauveria bassiana</i>                       |
| 168      | PTB77983.1             | 24242             | 106                | HSP20-like chaperone                      | <i>Trichoderma longibrachiatum</i> ATCC 18648   |
| 169      | KFA78328.1             | 79469             | 239                | hypothetical protein S40288_05032         | <i>Stachybotrys chartarum</i> IBT 40288         |
| 170      | KFA79660.1             | 47482             | 430                | hypothetical protein S40288_04082         | <i>Stachybotrys chartarum</i> IBT 40288         |
| 171      | KZZ94886.1             | 65977             | 1050               | ATP synthase beta chain precursor         | <i>Moelleriella libera</i> RCEF 2490]           |
| 172      | KND89290.1             | 42624             | 170                | Vacuolar protease A                       | <i>Tolypocladium ophioglossoides</i> CBS 100239 |
| 173      | PQK09468.1             | 55548             | 156                | hypothetical protein BB8028_0001g1538     | <i>Beauveria bassiana</i>                       |
| 174      | XP_018655921.1         | 59487             | 146                | ATP synthase subunit alpha, mitochondrial | <i>Trichoderma gamsii</i>                       |
| 175      | XP_018658099.1         | 31900             | 212                | 40S ribosomal protein S0                  | <i>Trichoderma gamsii</i>                       |
| 176      | XP_018656673.1         | 54863             | 254                | ATP synthase subunit beta                 | <i>Trichoderma gamsii</i>                       |
| 178      | PTB36680.1             | 38397             | 142                | hypothetical protein M441DRAFT_176232     | <i>Trichoderma asperellum</i> CBS 433.97        |
| 179      | AQX77513.1             | 40124             | 437                | actin gamma, partial                      | <i>Gliocladium</i> sp.                          |

| Spot no. | Best Protein Accession | Best Protein Mass | Best Protein Score | Best Protein Description               | Organism                                     |
|----------|------------------------|-------------------|--------------------|----------------------------------------|----------------------------------------------|
| 180      | CCE27930.1             | 30012             | 248                | probable 14-3-3-like protein           | <i>Clavicepspurpurea</i> 20.1                |
| 181      | KFA76311.1             | 17815             | 339                | hypothetical protein S40288_02977      | <i>Stachybotryschartarum</i> IBT 40288       |
| 182      | CEI40789.1             | 72567             | 81                 | unnamed protein product                | <i>Fusariumvenenatum</i> ]                   |
| 183      | XP_018183267.1         | 17532             | 225                | translationelongationfactor, IF5A      | <i>Purpureocilliumlilacinum</i>              |
| 184      | KFA79660.1             | 47482             | 241                | hypothetical protein S40288_04082      | <i>Stachybotryschartarum</i> IBT 40288       |
| 185      | XP_018656887.1         | 23353             | 236                | hypothetical protein TGAM01_v209462    | <i>Trichodermagamsii</i>                     |
| 186      | OAA44345.1             | 141716            | 99                 | 1,4-alpha-glucan branchingenzyme       | <i>Metarhiziumrileyi</i> RCEF 4871           |
| 189      | KDB12143.1             | 33116             | 109                | proteasome regulatory subunit 12       | <i>Ustilaginoideavirens</i>                  |
| 190      | AQX77513.1             | 40124             | 437                | actin gamma, partial                   | <i>Gliocladium</i> sp.                       |
| 191      | EFY92780.1             | 45159             | 246                | TH14-3-3 like protein                  | <i>Metarhiziumacridum</i> CQMa 102           |
| 192      | KIL96612.1             | 10977             | 82                 | hypothetical protein FAVG1_01356       | <i>Fusariumavenaceum</i>                     |
| 194      | XP_018160338.1         | 17955             | 346                | Cytochrome c oxidase subunit Va        | <i>Colletotrichumhigginsianum</i> IMI 349063 |
| 195      | PQK16496.1             | 36069             | 98                 | hypothetical protein BB8028_0006g08160 | <i>Beauveriabassiana</i>                     |

| Spot no. | Best Protein Accession | Best Protein Mass | Best Protein Score | Best Protein Description                    | Organism                                |
|----------|------------------------|-------------------|--------------------|---------------------------------------------|-----------------------------------------|
| 196      | XP_018181948.1         | 27661             | 149                | RanBP1 domain-containing protein            | <i>Purpureocilliumlilacinum</i>         |
| 197      | KFH44584.1             | 36904             | 114                | hypothetical protein ACRE_046720            | <i>Acremoniumchrysogenum</i> ATCC 11550 |
| 198      | XP_023424735.1         | 70964             | 212                | probable heat shock protein 70 (hsp70)      | <i>Fusariumfujikuroi</i> IMI 58289]     |
| 199      | EJP67331.1             | 72459             | 177                | hsp70-like protein                          | Beauveriabassiana ARSEF 2860            |
| 201      | KLO87050.1             | 15126             | 98                 | putative ribosomal protein S19.e, cytosolic | <i>Fusariumfujikuroi</i>                |
| 203      | AID48698.1             | 37472             | 88                 | actin, partial                              | <i>Neotyphodium</i> sp. NI_201308]      |
